# Supplementary material for: Excellent supercapacitance performance of 3-D mesoporous carbon with large pores from FDU-12 prepared using a microwave method
Source: Royal Society of Chemistry journal article supplement (doi:10.1039/c8ra01281d), 2018-01-01
Supplement: c8ra01281d1.pdf [file c8ra01281d1.pdf]

## Supplementary Information

### Excellent supercapacitance performance of 3D mesoporous carbon with large pores from FDU-12 prepared by microwave method

*Wangsoo Cha<sup>a</sup>, Siddulu Naidu Talapaneni<sup>a\*</sup>, Devaraju M. Kempaiah<sup>b</sup>, Stalin Joseph<sup>a</sup>, Kripal Singh Lakhi<sup>a</sup>, Abdullah M. Al-Enizi<sup>c</sup>, Dae-Hwan Park<sup>a</sup>, Ajayan Vinu<sup>a\*</sup>*

<sup>a</sup> Global Innovative Center for Advanced Nanomaterials (GICAN), Faculty of Natural Built Environment and Engineering, School of Engineering, The University of Newcastle, Callaghan, NSW 2308, Australia.

<sup>b</sup> Future Industries Institute, Division of Information Technology Energy and Environment, University of South Australia, Adelaide, SA 5095, Australia

<sup>c</sup> Department of Science, King Saud University, Riyadh, Saudi Arabia

\*To whom the correspondence should be addressed

Email: [SidduluNaidu.Talapaneni@newcastle.edu.au](mailto:SidduluNaidu.Talapaneni@newcastle.edu.au)

[Ajayan.Vinu@newcastle.edu.au](mailto:Ajayan.Vinu@newcastle.edu.au)

Ph: +61-2-4921-8669

## Characterization

The morphology of the samples was determined by HR-SEM (JEOL JSM 6610) operating at an acceleration voltage of 15kV and the working distance of 8 mm. HR-TEM images of the samples are obtained from JEOL JEM-2000EX2 operating at an acceleration voltage of 200 kV. The powder X-ray diffraction (XRD) pattern measurements were recorded on a Rigaku diffractometer equipped with Cu  $\alpha$  radiation ( $\lambda=0.154$  nm), The diffraction peaks were recorded by selecting  $2\theta$  range from  $0.3^\circ$  to  $5^\circ$  with a step size of 0.01 per second. The nitrogen adsorption and desorption measurements were carried out on a Micromeritics ASAP2420. Before the analysis, all the samples were degassed for 6 h at 200 °C. The specific surface area of each material was calculated by using the Brunauer – Emmett – Teller (BET) analysis whereas the pore size distribution was obtained according to the Non-Local Density Functional Theory (NLDFT) method. Electrochemical measurements such as cyclic voltammetry (CV) and chronopotentiometry were carried out for the charging-discharging characteristics on a CHI 760C electrochemical workstation, and an impedance spectroscopy measurement was investigated on a ZIVE mp2 electrochemical workstation. The electrochemical measurements of all the samples were carried out in 2 M KOH aqueous electrolyte solution with a standard three-electrode cell. Ag/AgCl and Pt were used as a reference and counter electrode respectively. For the electrochemical measurement, electrode materials were prepared by mixing 90 wt % of MCF-M-T materials (1 mg) and 10 wt % of polyvinylidene fluoride (PVDF) in isopropanol. The slurry was coated onto a nickel foam and the nickel foam was pressed, and dried at 100 °C in the vacuum oven overnight. The CV and chronopotentiometry measurements were carried out in a potential range from -0.6 V to 0.2 V at different scanning rates and current densities. The impedance spectroscopy measurement was carried out using frequency range between 1 MHz and 1 mHz with an amplitude of 0.005 V. In addition, the capacitive performance of MCF-M-150 was further studied using a 2032 two-electrode standard coin cell. The working electrode was prepared by thoroughly mixing with active material of 80 wt%, conductive support of 10 wt% and binder (poly acrylic acid and carboxymethyl cellulose, ratio 5:5) of 10 wt% in ethanol. The slurry was spread onto a copper sheet and completely dried in the vacuum oven overnight. The coin cell was assembled with 1M Na<sub>2</sub>SO<sub>4</sub> as electrolyte and thin polypropylene film as separator. The capacitance was calculated using the equation;  $C = 2(I\Delta t/m\Delta V)$ , where I is current (A),  $\Delta t$  is the discharging time in (s),  $\Delta V$  is the range of voltage in (Volts), and m is the weight of the active materials in (g).

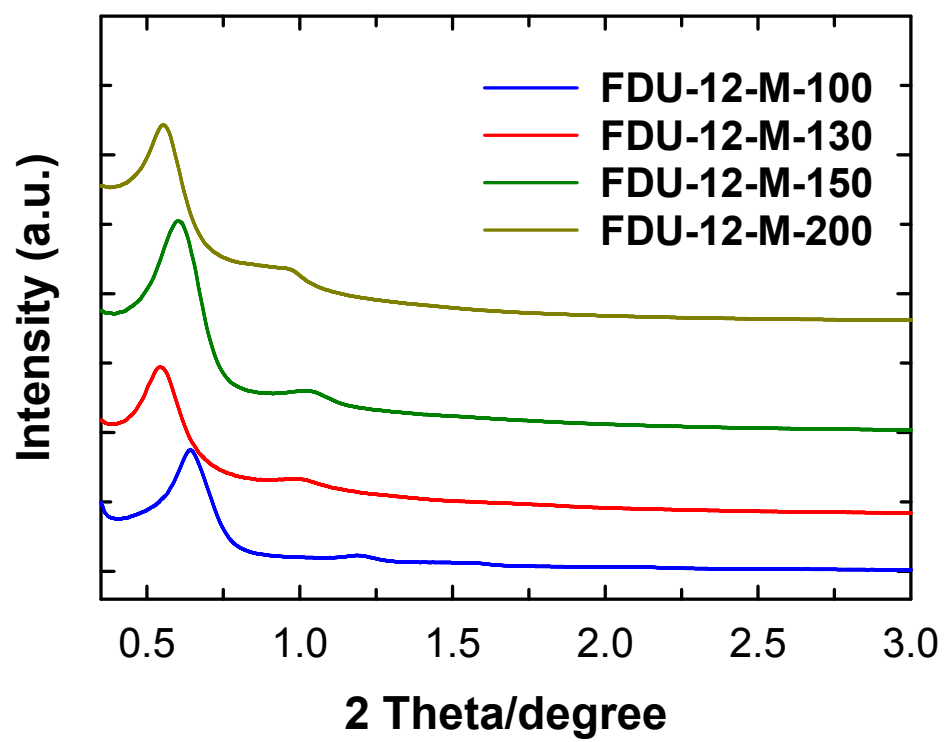

**Figure S1:** Powder XRD patterns of FDU-12-M-T synthesized by microwave irradiation

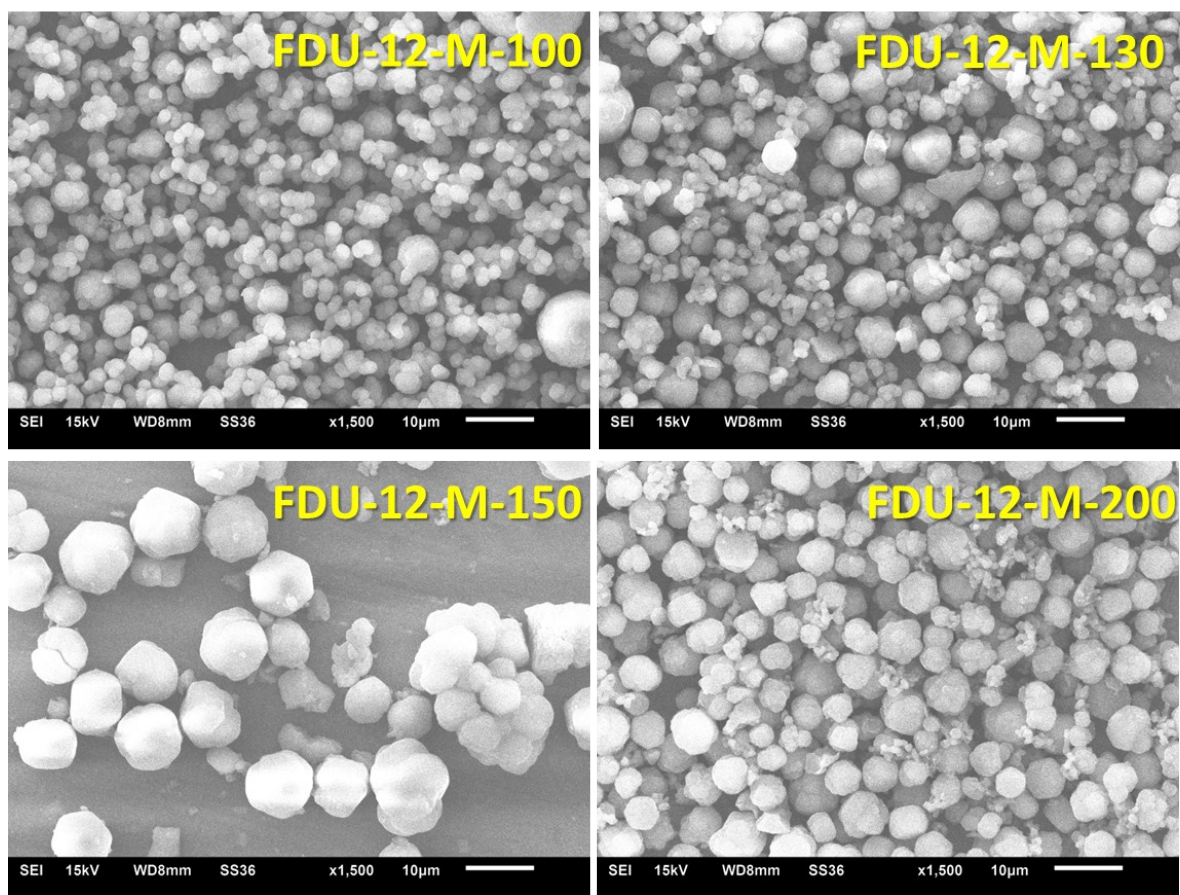

**Figure S2:** SEM images of FDU-12-M-T samples synthesized by microwave irradiation

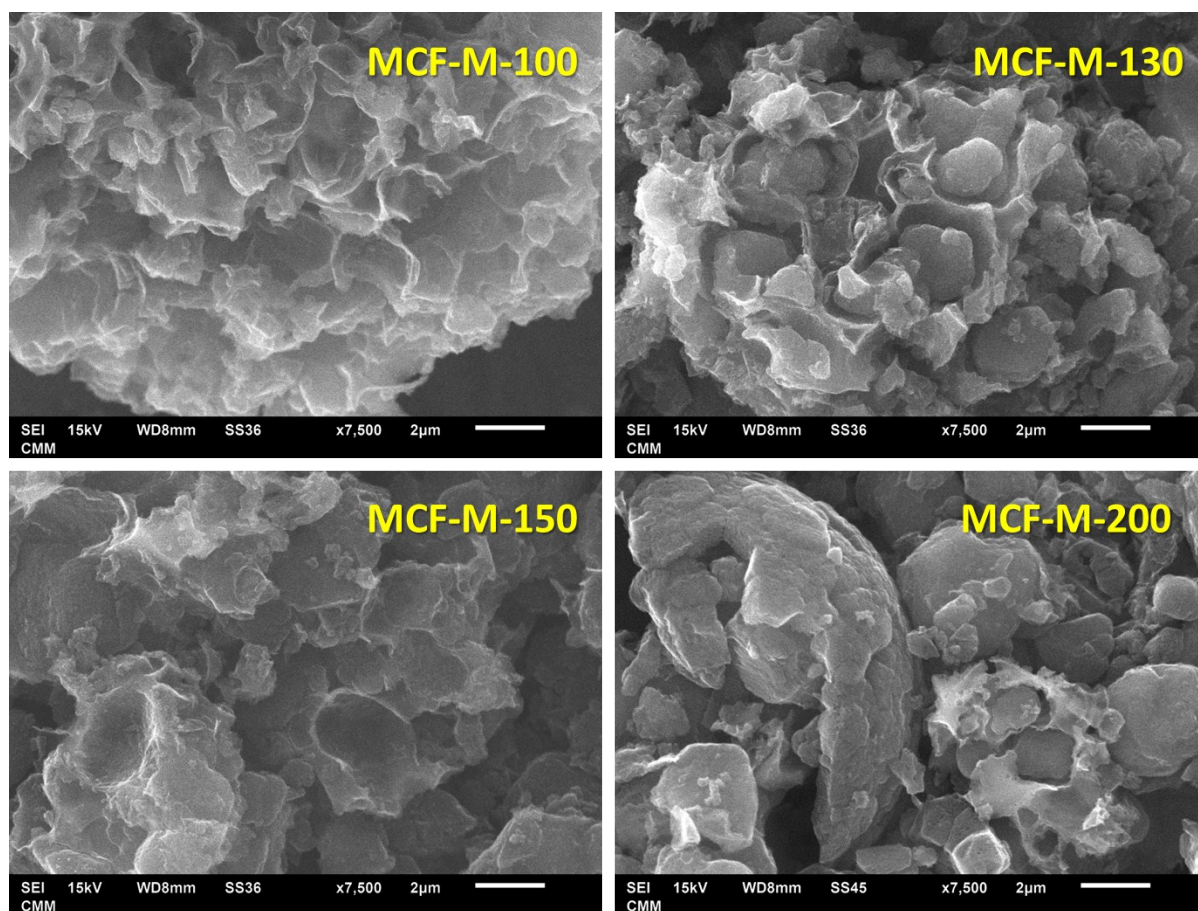

**Figure S3:** HR-SEM images of MCF-M-T samples synthesized by using FDU-12-M materials by carbonization at 900 °C for 6h

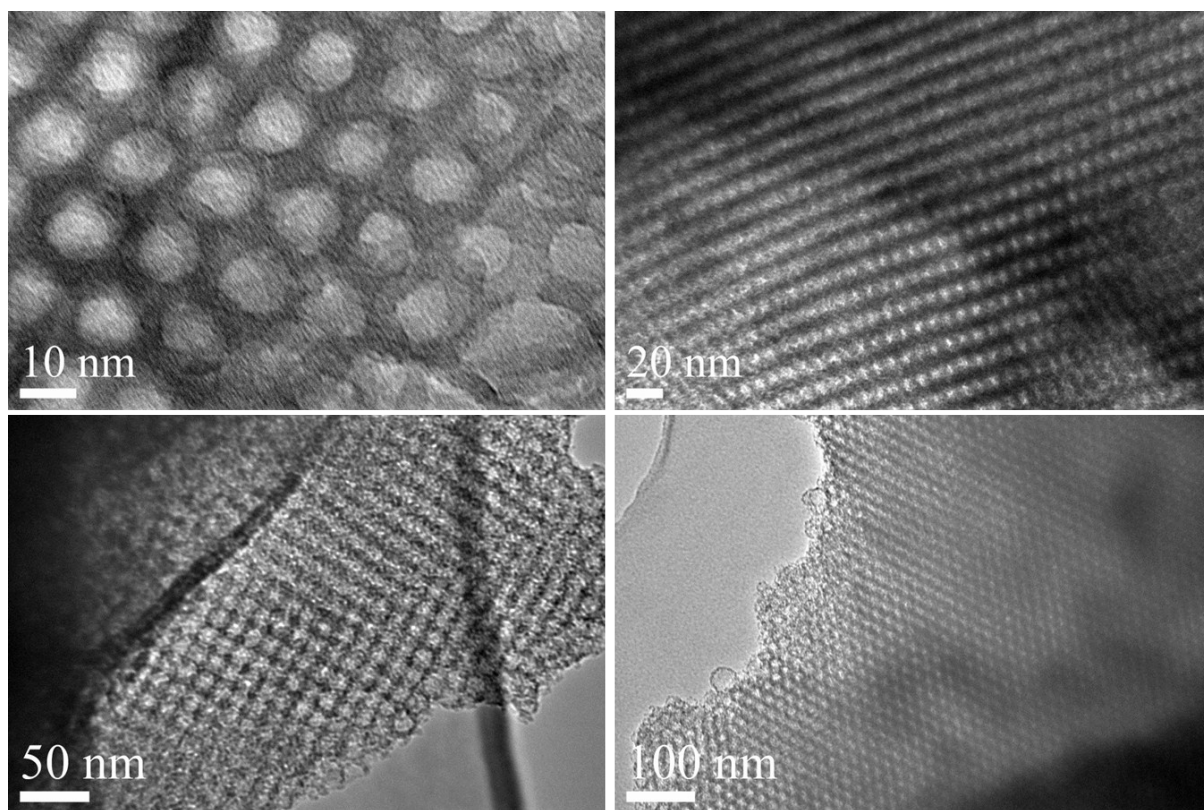

**Figure S4:** HRTEM images of FDU-12-M-150



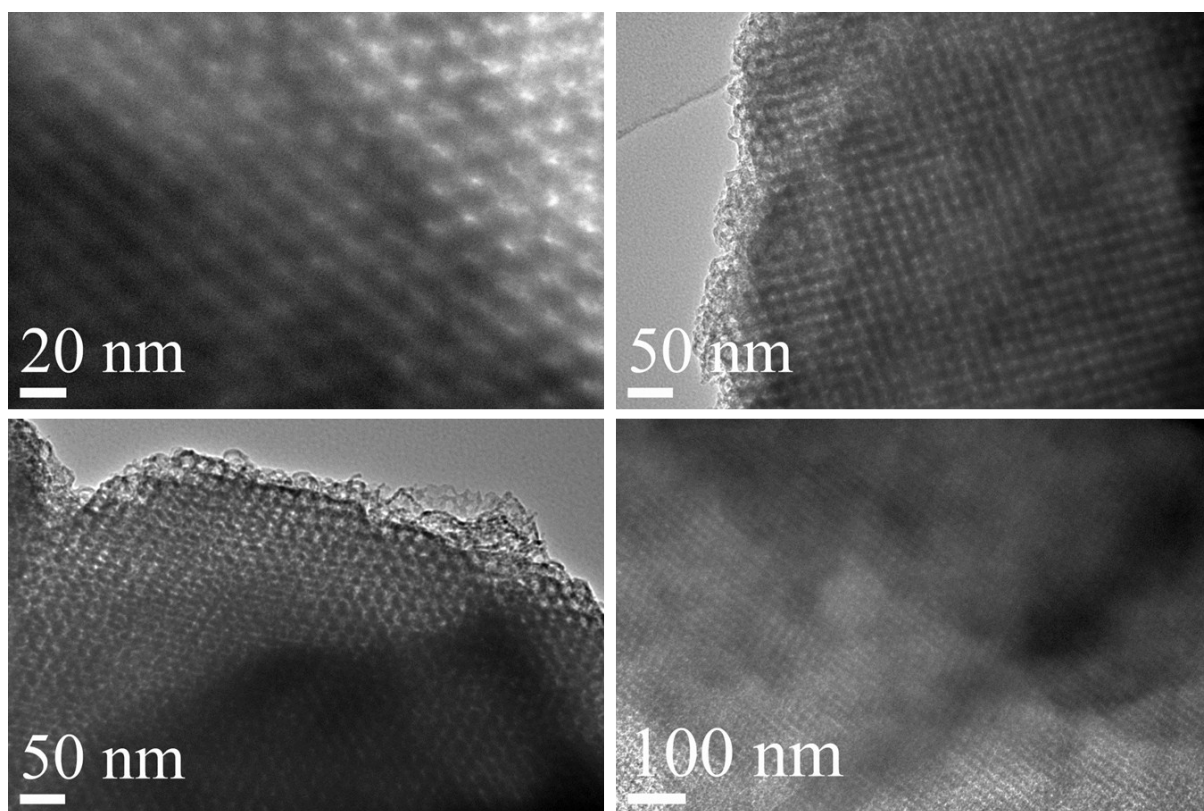

**Figure S5:** HRTEM images of FDU-12-M-200 sample



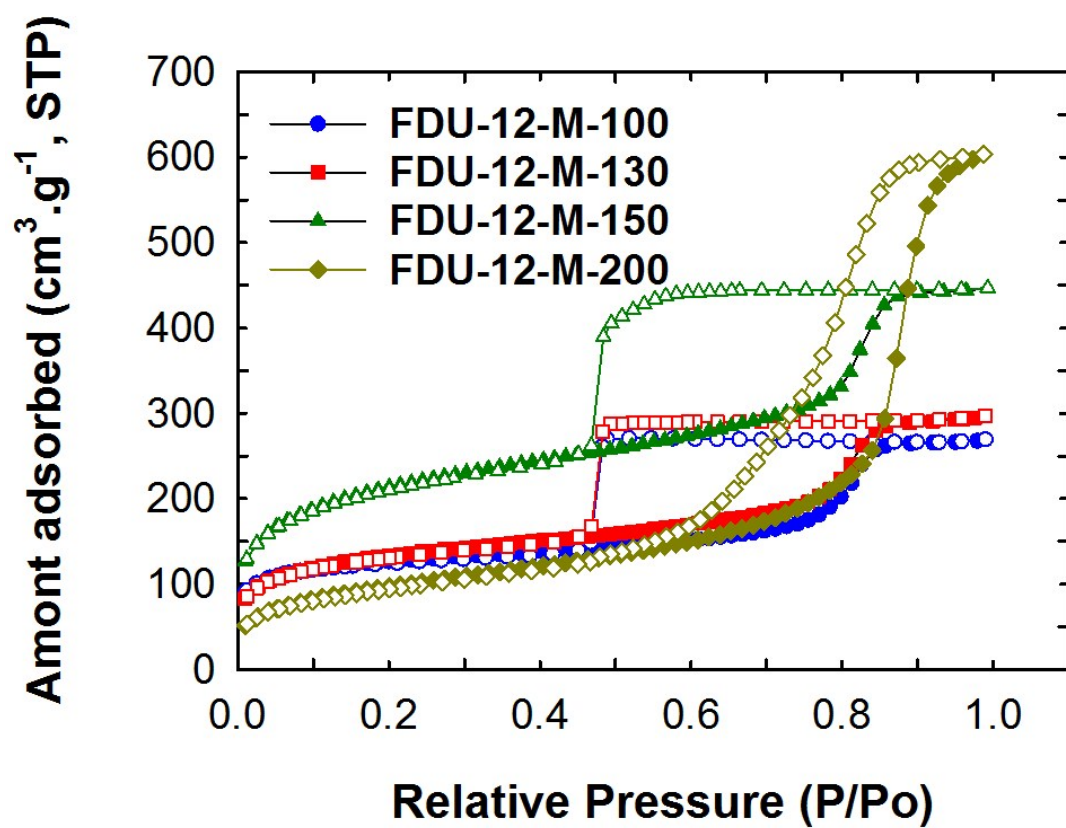

**Figure S6:** Nitrogen absorption desorption isotherms of FDU-12-M-T

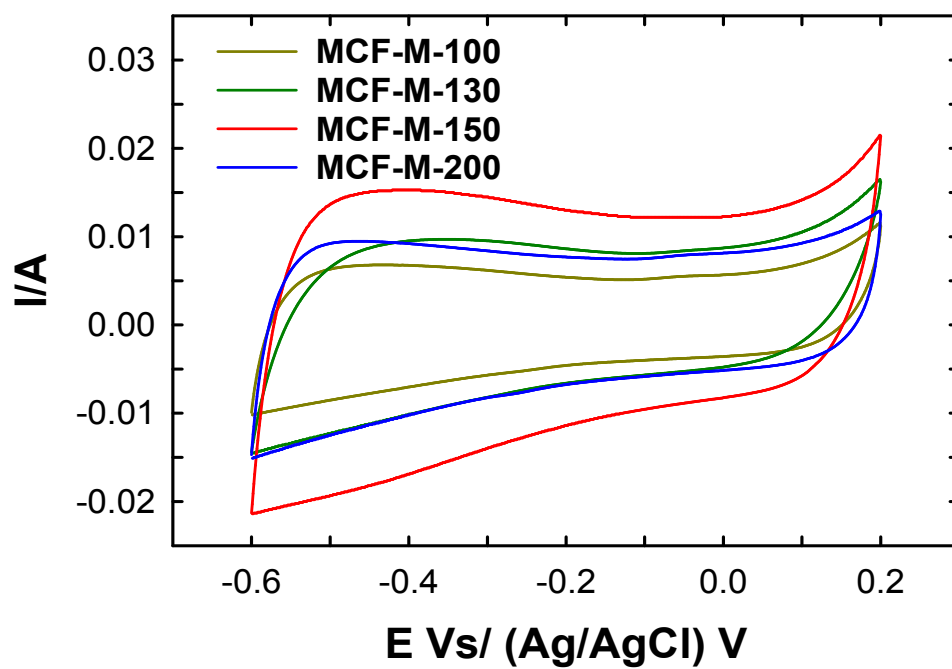

**Figure S7:** CV profiles of the MCF-M-T samples at scanning rate of 100 mVs<sup>-1</sup>

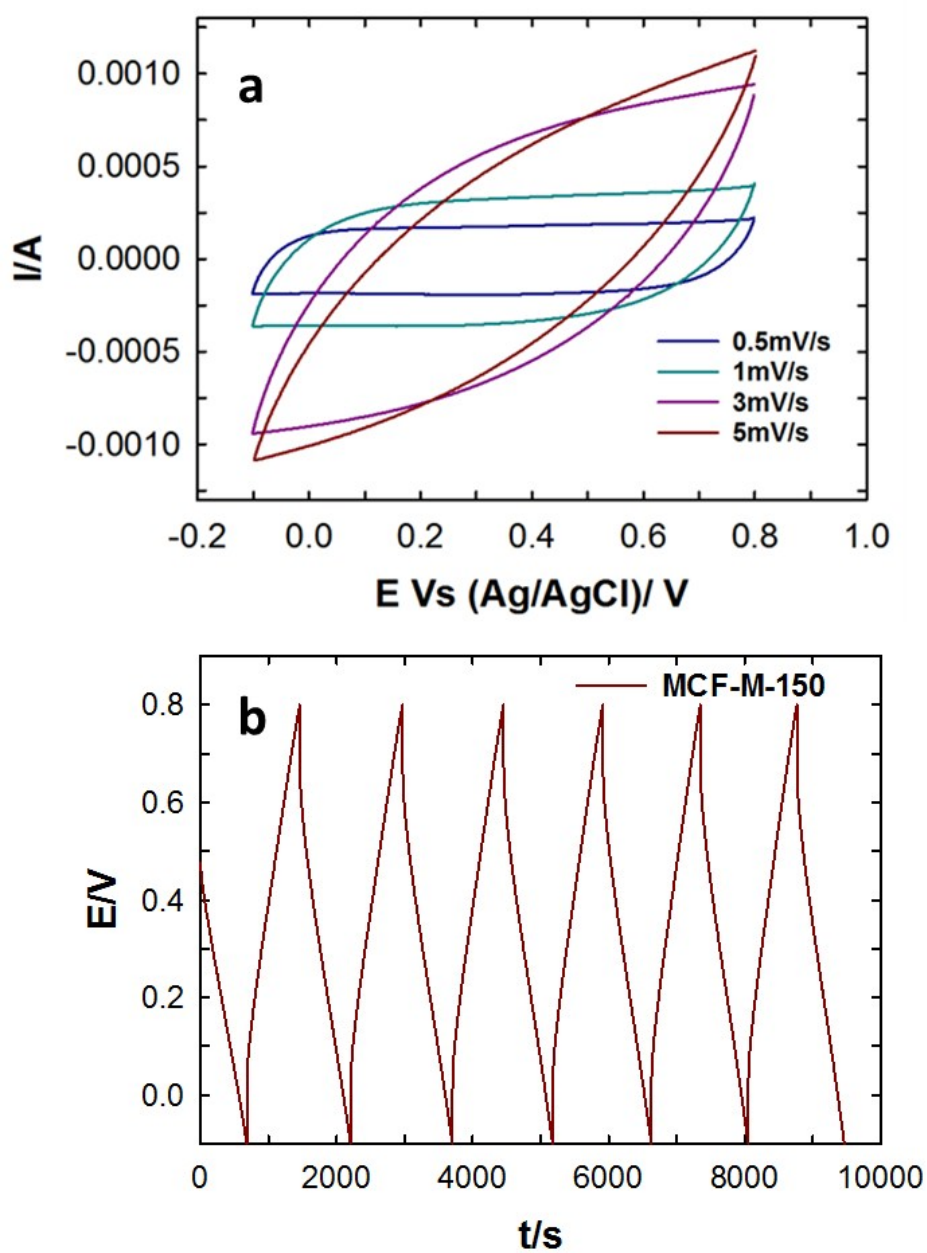

**Figure S8:** (a) CV profiles of symmetric capacitor of MCF-M-150 at different scanning rate; (b) Charge-discharge profile of symmetric capacitor of MCF-M-150 at current density of 0.15 A g<sup>-1</sup>.

**Table 1S:** Comparison of specific capacitance in supercapacitors using carbon based materials showing EDLC behaviour.

| Materials               | Specific surface area                 | Specific capacitance    | Current density         | Electrolyte                       | Reference    |
|-------------------------|---------------------------------------|-------------------------|-------------------------|-----------------------------------|--------------|
| Porous carbon           | 2339 m <sup>2</sup> g <sup>-1</sup>   | 218 F g <sup>-1</sup>   | 0.1 A g <sup>-1</sup>   | 6M KOH                            | 1            |
| MWCNT                   | 250 m <sup>2</sup> g <sup>-1</sup>    | 22F g <sup>-1</sup>     | 1 mA cm <sup>-2</sup>   | 2M H <sub>2</sub> SO <sub>4</sub> | 2            |
| Activated carbon        | 747 m <sup>2</sup> g <sup>-1</sup>    | 55F g <sup>-1</sup>     | 1 mA cm <sup>-2</sup>   | 2M H <sub>2</sub> SO <sub>4</sub> | 2            |
| Mesoporous carbon CMK-3 | 1350 m <sup>2</sup> g <sup>-1</sup>   | 186 F g <sup>-1</sup>   | 1 mA cm <sup>-2</sup>   | 2M H <sub>2</sub> SO <sub>4</sub> | 2            |
| Mesoporous carbon CMK-8 | 1321 m <sup>2</sup> g <sup>-1</sup>   | 176 F g <sup>-1</sup>   | 0.625 A g <sup>-1</sup> | 2M KOH                            | 3            |
| MCF-M-150               | 1251.5 m <sup>2</sup> g <sup>-1</sup> | 315.3 F g <sup>-1</sup> | 1 A g <sup>-1</sup>     | 2M KOH                            | Current work |

- 1 K. Wang, M. Xu, X. Wang, Z. Gu, Q. H. Fan, W. Gibbons, J. Croat, RSC Adv., 2017, **7**, 8236–8240
- 2 D. S. Dhawale, M. R. Benzigar, M. A. Wahab, C. Anand, S. Varghese, V. V. Balasubramanian, S. S. Aldeyab, K. Ariga, A. Vinu, Electrochim. Acta, 2012, **77**, 256-261
- 3 J. Lang, X. Yan, X. Y. Yuan, J. Yang, Q.J. Xue, Journal of Power Sources, 2011, **196**, 10472–10478
